# Supplementary material for: Towards personalised molecular feedback for weight loss
Source: BMC Obes. 2019 May 6;6:20. doi: 10.1186/s40608-019-0237-5 (PMC6501287; doi:10.1186/s40608-019-0237-5)
Supplement: Supplementary file 2 — Raw Data. The file includes the raw data collected during the study. (XLSX 46 kb) [file 40608_2019_237_MOESM2_ESM.xlsx]

## Sheet: Sheet1
user id	day type ( calories based)	day (meal based)	Day	Date	carbs (g)	protein (g)	fat (g)	carbskcal	protein kcal	fat kcal	Gender F/M	BMI	Height / cm	Weight / kg	Total calories	Volume / mL	Total insulin pg	First insulin	Last insulin	Following day insulin	Max insulin	Min insulin	Fasting time	Weight difference	Time of max hr insulin	Time of min hr insulin	Insulin before meal 1	Insulin before meal	Total lactate ug	First lactate ug	Last lactate ug	Following day lactate ug	Max lactate ug	Min lactate ug	Time of max hr lactate	Time of min hr lactate	lactate before meal 1	lactate after meal 1	lactate before meal 2	lactate after meal 2
65	c	B/L/D/S	1	2015-11-10	360.64	103.28	80.64	1442.56	413.12	725.76	F	31.8	173	95.2	2628	3015	124938	26813	18810	24382	32835	11004	6	0	15	18	26813	25000	254467	32862.5	26571.1	11540	107898	32565.9	15	17.4	32862.5	54569.8	54569.8	107898
	c	B/L/D/S	2	11	201.36	63.44	79.64	805.44	253.76	716.76	F	31.8		95.2	1804	3470	178292	24382	16078	4886	51282	2052		0.4	15	6	24382	27536	297268	11540	54485.1	25409.1	62419.9	11540	6.45	7.3	11540			23054.2
	c	B/L/D/S	3	12	160.77	26.52	50.62	643.08	106.08	455.58	F	31.6		94.8	1440	2250	67296.3	4886	7711	20169	31992	4886		1.1	14.3	6	4886	14120	356061	25409.1	33776.2	90803	143569	25409.1	14.3	6.45		82854.9	82854.9	143569
	c	B/L/D/S	4	13	163.54	52.54	47.41	654.16	210.16	426.69	F	31.3		93.7	1360	3475	73717.3	6389	229996	9319	22996	1921		1.2	23.35	12	6389	1921	733896	90803	225239	72351	225239	87918.5	23.35	12.15	90803	117285	87918.5	106446
	c	B/D/S	5	15	186.2	56.43	30.59	744.8	225.72	275.31	F	31.1		93.1	1189	3500	84825.8	23453	11848	10050	23453	3100		-0.2	7.3	17.3	234523	3100	582095	72351	76337	65619.1	123870	72351	11	7.3	72351	123870	88555.7	101859
	d	B/D/S	6	16	164.69	45.91	37.29	658.76	183.64	335.61	F	31.1		93.3	1211	3600	65537	10050	10276	12882	17353	7594		0.6	21	6	10050	7594	278690	65619.1	44539.2	83504	102573	65619.1	7.3	4.2	65619.1			65958.3
	c	B/D/S	7	17	141.91	43.18	53.84	567.64	172.72	484.56	F	30.9		92.7	1288	2940	72105.2	12882	8879	14861	21668	8879		0.3	16.2	23.3	12882	12587	294735	83504	37928.8	30824.4	106210	37928.8	16.2	23.4	83504			106210
	d	L/D/S	8	18	149.56	34.72	35.18	598.24	138.88	316.62	F	30.8		92.4	1104	3020	89490.7	14861	8762	9479	26510	8036		0.5	10.35	18	14861	26510.2	397654	30824.4			101556	30824.4	10.35	6.45	30824.4	101556	70859.7	92186.4
	d	B/D/S	9	19	172.67	42.14	21.11	690.68	168.56	189.99	F	30.7		91.9	1101	2610	75511.2	9476		20050	34696	9479		0	20	6	9479	14387	630354	26763.3	114103	69685.9	158833	114103	11.15	20.1	26763.3	357418	357418	114103
	d	B/D/S	10	20	144.62	37.66	36.07	578.48	150.64	324.63	F	30.7		91.9	1071	2630	100879	20050	19618	10436	26035	14315		0.1	15.45	19.3	20050	20860	468710	69685.9	60907.1	52563.2	235429	60907.1	11	19.3	69685.9	235429	102687	60907.1
	d	B/L/S	11	23	145.38	37.67	29.58	581.52	150.68	266.22	F	30.5		91.4	967	2450	38325.5	21176	575	2449	21176	575		-0.1					544682	52563.2	152265	113205	152265	52563.2	22.05	6.45	52563.2	113015	113015	226839
	d	B/D/S	12	24	119.16	25.04	26.48	476.64	100.16	238.32	F	30.5		91.5	848	3050	42112.1	2449	22378	17442	22378	2449		0.8	21.3	6	2449	11142	461115	113205	207159	71222.4	207159	119541	21.3	10.25	113205	119541	134415	207159
	d	L/D/S	13	25	134.49	29.46	32.36	537.96	117.84	291.24	F	30.3		90.7	979	3220	66980	17442	6589	13334	28880	1174		0.4	10	14.3	17442	28880	638042	71222.4	81500.2	45947	213566	71222.4	14.3	6.5	71222.4	135940	213566	135814
	d	B/D/S	14	26	148.53	23.23	16.09	594.12	92.92	144.81	F	30.1		90.3	828			13334	9261		27804	9261		0.2					436174	45947	166418	112570	223809	45947	16.05	6.45	45947		223809	166418
	d	D/S	15	27	107.8	40.31	13.62	431.2	161.24	122.58	F				644	2670	64388.1	9261	22983		22983	9261							698797	163331	156659		251770	127037	16.18	0.15	251770	156659	88321.6	75518
	d	L/D/S	16	2015-12-01	91.84	20.49	49.58	367.36	81.96	446.22	F	30		89.8	979			10078	9357	5317			5.5	-0.1					509140	112570	75518	74735.4	168677	64054.4	14.25	9.05	112570	64054.4	83064.4	125243
	d	B/L/S	17	2015-12-02	99.26	32.02	28.87	397.04	128.08	259.83	F	30		89.9	805	2140	27607	5317	7771	6308	9713	4806		0.1	11	18	5317	9713	398859	74735.4	115816	63183.1	125243	74735.4	17.56	7	74735.4	83064.4	118833	143580
	d	B/D/S	18	2015-12-03	169.64	26.79	26.14	678.56	107.16	235.26	F	30		89.8	1016	2610	55153	6308	5281		21125	5281		0.6	23.3	7.3	6308	15230	652226	63183.1	31289.9		295340	31289.9	12.05	23.4	63183.1	295340	78984.6	224743
	d	L/D/S	19	2015-12-07	142.12	23.47	25.27	568.48	93.88	227.43	F	29.7		89	933	2880	69227	11790	9324	11134	19253	5518		0.8	18	9	11790	5518	646428		64490.7	36479.2	238241	39969.1	12.4	8.5		39969.1	43552	175890
	d	B/D/S	20	2015-12-08	121.95	27.26	39.39	487.8	109.04	354.51	F	29.4		88.2	970			11134	13742										424184	36479.2	175890		175890	36479.2	22.45	6.5	36479.2	168263
	d	B/L/S	21	2015-12-10	164.59	52.28	41.03	658.36	209.12	369.27	F	29.4		88.1	928	3420	72177	5334	5550	11639	15742	3828		0.2	16	10.3	5334	3828	51692.1	42462.4	153902	42462.4	68356.6	42462.4	23.4	6.5	42462.4	82139.8	191658	153902
68	c	B/L/D/S	1	2015-11-27	227.87	100.93	66.3	911.48	403.72	596.7	F	18.9	165	51.4	1840	1140	343369	129349	40163	29547	129349	22448		0	8.3	15.2	129349	50899	170554	62205.2	85126.9	18848.7	85126.9	5613.11	20.57	15.2	17609.3	5613.11	5613.11	85126.9
	d	L/D/S	2	28	95.25	37.5	33.19	381	150	298.71	F	18.9		51.4	812	1370	270629	29547	100347	22649	100347	10225		0.8	21.3	12.3	29547	10225	93622.7	18848.7	25372	22930.9	25372	5317.87	21.34	0.51	15919.3	13397.4
	c	B/L/D/S	3	29	189.36	69.95	33.65	757.44	279.8	302.85	F				1397			22649	39515	35984	95270	22649		0					72641.2	22930.9	22179.4		27531	22179.4	13.01	18.01	27531	22179.4	22179.4
72	d	D/S	Incomplete	2015-11-26	77.61	32.52	29.14	310.44	130.08	262.26	F	25	173	75.1	698			33024	67176	25980				0.2
69	d	L/D/S	Incomplete		139.59	97.2	127.13	558.36	388.8	1144.17	F	21.1	156	45																							16834.6	13067.7
54	d	D/S	1	2015-10-15	69.39	58.31	15.6	277.56	233.24	140.4	F	33.5	158	84.5	638			5324		100			12.5	0.9						15346.7		29069.4					15346.7
			2	2015-10-19	30.44	8.32	11.48	121.76	33.28	103.32	F	33.8		84.6				25457	6763	14760			14	0						29069.4	27700.9	32839.7
			3	20	no info			#VALUE!	0	0	F	33.8		84.6				14760	12323	44430				0.4						32839.7	38957.1
4	d	D/S	1	2015-09-02	65.48	51.74	37.29	261.92	206.96	335.61	F	36.6	163	97.3	794			11297	21614				10	0.5						22051.4	25748.3	64751.5					22051.4	25748.3
	d	D/S	2	2015-09-06	49.63	55.88	27.86	198.52	223.52	250.74	F	36.8		97.8	657			14245	8415				9.5	1						64751.5	3217.78	30642.5					64751.5	3217.78
	d	D/S	3	2015-09-08	84.32	57.53	24.16	337.28	230.12	217.44	F	36.2		96.2	779			19073	14525				11	0.7						30642.5	21608	17000					30642.5	21608
	d	D/S	4	2015-09-10	36.79	53.36	23.02	147.16	213.44	207.18	F	36.1		96	570			21970	3443				10	0.1						17000	7046.3	72723.6					17000	7046.3
	d	D/S	5	2015-09-13	61.94	6.98	0.94	247.76	27.92	8.46	F	36.5		97.1	556			25047	5140				13	0.6						72723.6	1511.77	100243					1511.77
	d	B/S/D	6	2015-09-17	89.03	43.71	23.71	356.12	174.84	213.39	F	35.9		95.6	693			13449	3157				13	0.4						100243	7085.41	30882.4					100243		7085.41
	d	S/L/D	7	2015-09-24	52.69	53.12	19.42	210.76	212.48	174.78	F	36.2		96.4	793			28743	10536				11	0.4
28	d	D/S	1	2015-09-03	75.28	55.31	35.69	301.12	221.24	321.21	M	37.6	156	90	1043			16245	36735	14597			11.5	0.4							54518.8							54518.8
	d	L/S	2	2015-09-04	79.39	41.85	28.17	317.56	167.4	253.53	M	36.8		89.6	721			14598	49680	20653			7	1						25949.4	33414.5						25949.4	33414.5
15	c	L/S	1	2015-08-06	81.44	69.98	43.32	325.76	279.92	389.88	F	33.7		94.3	1017	1280		27504	4629				6	0.1					72749.2	34900.5	16590.2	72722	34900.5	16590.2	8.2	20.2	34900.5			21258.5
			2	2015-08-10	323	43.76	7.92	1292	175.04	71.28	F	33.5		93.6	639	500		11786	23509				10	0.6					122136	72722	49413.6		72722	49413.6	7.5	19.05
30	d	B/S	1	2015-08-17	116.71	44.57	27.09	466.84	178.28	243.81	F	34.9		100.9	850	3900	112942	34048	6494	8076	43511	3705	3.26	2.3	13	16.3	34048	43511	322999	112731	56.8384	23442.1	112731	14762.6	7.15	14.31	112731	70702.5
	d	B/S	2	2015-08-18	121.14	88.03	82.47	484.56	352.12	742.23	F	34.1		98.6	1561	810		8076	13494	5700				0.4					55571.6	23442.1	43.223	40011.3	23442.1	15560.3	6.3	22.1	23442.1	15560.3
	d	B/S	3	2015-08-19	120.07	57.56	20.02	480.28	230.24	180.18	F	33.9		98.2	887			5700	6266	6435				1.2					40011.3	40011.3	4941.91	6533.44					40011.3	4941.91
	d	D/S	4	2015-08-20	147.96	60.33	22.47	591.84	241.32	202.23	F	33.5		97	948			6435	9977	6930				1.5						6533.44	7342.12	8407.19					6533.44	7342.12
	c	L/D/S	5	2015-08-21	83.37	51.52	61.21	333.48	206.08	550.89	F	33		95.5	1094			6930	2051	5538				0.05						8407.19	1864.27	3680.87						1864.27
	c	L/S/D	6	2015-08-22	112.67	72.86	56.52	450.68	291.44	508.68	F	33		95.5	1245			5538	4935											3680.87	3700.74		3700.74	2554.48	23.46	18.15	3680.87	2554.48	2554.48	3700.74
14	d	B/D/S	1	2015-08-11	no info			#VALUE!	0	0	F	32.6	170	94.4	799	2410	101460	27117	22050	32149	30177	6414	12	0.5	21.57	16.15	27117	6605	147935	14043.4	31457.8	67.8682	45053.3	8593.49	14	21.57	14043.4	45053.3	21994.3	8593.49
	c		2	2015-08-12	no info			#VALUE!	0	0	F	32.4		93.8				32149		33864				-0.8					44114.4			17096.2
	d	B/D/S	3	2015-08-13	27.05	12.3	5.55	108.2	49.2	49.95	F	32.7		94.6	950	2100	78555	33864	22326	44275	33864	5325	11	1	6.2	16.3	33864	5325	168152	17096.2	12682.5	12750.2	69973.4	12682.5	12.55	20.58	17096.2	24102.9	44296.9	12682.5
	d	B/D/S	4	2015-08-17	31.66	13.39	20.11	126.64	53.56	180.99	F	32.6		94.4	1050	2650	156801	49525	26189	18945	49525	16632	11	1.3	6.2	13.5	49525	19242	157524	12750.2	12009.7	10417.5	73843.5	12009.7	23.49	22.3	12750.2	41749	17171.2	12009.7
	d	B/D/S	5	2015-08-18	69.28	58.65	18.03	277.12	234.6	162.27	F	32.2		93.1	817	2800	135492	18945	7899		43560	7899	11	0.6	10.29	16.38	25149	7899	208752	10417.5	29916		66738.7	10417.5	12.32	6.08	36953.9	19914.5	29916
23	d	L/D/S	1	2015-09-01	22.55	28.16	25.44	90.2	112.64	228.96	M	30.1	184	102	884				19612	22608			6	1.3							73345.1									73345.1
	d	B/D/S	2	2015-09-03	167.79	38.89	16.42	671.16	155.56	147.78	M	29.5		100	860				49077	24464			9	0.2							65279.9									65279.9
	d	B/D/S	3	2015-09-15	170.38	33.84	19.1	681.52	135.36	171.9	M	29.1		98.7	922				6614	33642			12	0.9							8528.23									8528.23
	d	B/S	4	2015-09-16	124.47	25.19	10.3	497.88	100.76	92.7	M	28.8		97.8	634			33642	2605	56016				0.25						42622.7	60785.7						42622.7	60785.7
47	d	B/D/S	1		101.38	71.86	52.79	405.52	287.44	475.11	F	38	163	101	610	2050	192453	50804	10520	11097	54458	9135	10	0.6	21	13.3	50804	11750	377854	133774	22933.3		133774	22933.3	6.25	22.06	133774	65870	49490.3	70376.7
35	d	D/S	1	2015-09-06	18.18	7.16	10.34	#VALUE!	0	0	M	35.9	175	110	1223	975	246760	44403	99643	48564	99643	5719	8	0	23.3	22	44403	5719	275258	164122	34065.6	78607.5	164122	16240.9	12.59	22.04	85152.2	64173.2	16240.9	34065.6
	d	L	2	2015-09-09	no info			0	0	0	M	36.2		111	1250	600	136853	31756	105097	68857	105097	31756	11	1	18	10.3	31756		149325	85152.2	64173.2	75622.3	85152.2	64173.2	18	10.3
56	d	B/D/S	1	2015-09-22	166.82	52.56	53.58	667.28	210.24	482.22	F	34.1	155	81.9	1072	1640	80200	12984	18580	19854	20680	7490	13	1.3	11.3	14	12984	20467	104716	12835.7	25142.6		28151	12835.7	10.3	7	12835.7	28151	21722.1	25142.6
66	c	B/L/D	1	2015-10-14	277.86	97.35	36.99	1111.44	389.4	332.91	M	20.8	188	73.8	1811	1560	645372	99398	49325	213683	315476	5465	4	-0.3	12	19.3	99398	315476	93898.4	24840.1	6436.82	43806.9	37636.3	5960.43	12.05	19.1	37636.3	19024.8	19024.8	5960.43
	c	>3 meals	2	2015-10-15	219.71	95.04	75.64	878.84	380.16	680.76	M	20.9		74.1	1914	1540	549689	213683	101385	80860	213683	23096	12	0.2	9	18.3	213683	23096	80100.2	43806.9	11532.4	21359.3	43806.9	7310.12	7.55	18.33	43806.9			17450.7
	d	B/D/S	3	2015-10-19	136.06	83.4	71.44	544.24	333.6	642.96	M	21.3		75.4	1529	3180	444473	2304	316556	34175	316556	2304		-0.2	22	2	2304	25412	274802	21359.3	42251.1	27591.9	73114	6706.7	10.47	10	42251.1	21359.3
	d	B/D/S	4	2015-10-20	124.8	46.6	39.2	499.2	186.4	352.8	M	21.1		74.7	1022	2670	167011	34175	14908	177704	44570	14908	15	0.6	18	19.3	34175	44570	148573	27591.9	12947.8	23137.2	81976.5	4810.14	7.45	19.45	27591.9	81976.5	21246.3	12947.8
	c	D/B/S	5	2015-10-21	267.8	30.6	46.2	1071.2	122.4	415.8	M	20.9		74.1	1611	2710	419513	177704	126025	30727	177704	5410	16	-1.1	5	18	177704	5410	166087	23137.2	20252	18779	74034.3	7646.64	8.06	18.1	23137.2	12032.5	7646.64	20252
	d	L/D/S	6	2015-10-22	164.3	61.29	34.19	657.2	245.16	307.71	M	21.2		75.2	1233	3410	121237	30727	10584	137788	31136	9007		1.3	11.3	21.3	30727	20500	166444	18779	59477.8	49323.6	59477.8	18779	21.1	5.57	24312.3			59477.8
	d	L/D/S	7	2015-10-23	215.79	42.98	20.89	863.16	171.92	188.01	M	20.9		73.9	1265	2450	303980	137788	124944	30184	137788	6888		0	5	9	137788	26742	159441	49323.6	29444.3	76184.2	49323.6	648.164	5.06	18	49323.6	22232.5	648.164	29444.3
	c	B/L/D/S	8	2015-10-24	116.47	48.41	21.43	465.88	193.64	192.87	M	20.9		73.9	949	3940	112092	30184	8988	10505	38185	507		-0.2	12.3	8	30184	38185	233801	76184.2	14263.3	24398.1	76184.2	14263.3	5.09	22	76184.2	23163	14916.7	14263.3
	d	B/D/S	9	2015-10-25	247.79	81.98	50.92	991.16	327.92	458.28	M	20.9		74.1	1947	1890	239488	10505	12307	1917	125866	3740		0.2	10	11.3	10505.1	84157	225599	24398.1	17271.3		165411	4520.01	2.19	11.29	165411	24398.1		13998.6
	d	D/S	10	2015-10-26	116.12	42.17	24.74	464.48	168.68	222.66	M	20.9		73.9	944	2710	84868.8	1917	3888	76292	47730	1917		0.2	14	2.3	1917	47730	112833		18615.9		25934.3	6621.08	14	17.36	16768.6	25934.3	25934.3	20957.2
	d	D/S	11	2015-10-27	126.64	21.73	33.66	506.56	86.92	302.94	M	20.8		73.7	867	850	210064	76292	114660	64125	114660	19113		0	23.3	17		19113	68781.5		13129.3	30762.1	31355	18259.6	1.59	17.55	18259.6	19166.8
	c	B/L/D	12	2015-10-28	199.7	54.6	47.18	798.8	218.4	424.62	M	20.8		73.7	1560	2380	198344	64125	5424	2627	106358	4333			8	19.3	64125	106358	132713	30762.1	6375.81	25741	34835.2	13129.3	16.51	23.28			34835.2	31549.6
	d	L/D	13	2015-10-29	149	38	24	596	152	216	M				957	2130	97707.7	2627	78533	6762	78533	2627			23	9	10085	6463	132070	25741	11457.5	29224.8	59588.2	25741	14.22	9.02	40364.9			6375.81
	d	B/D/S	14	2015-11-02	110.22	30.86	34.8	440.88	123.44	313.2	M	20.7		73.5	863	3620	210990	13328	55557	85763	67089	4855	15	0.1	9	19.3	13328	4855	148031	29224.8	1006.04	41964.9	31490.9	6015.6	3.11	18.15	31490.9	29224.8	8316.75	11457.5
	c	B/D/S	15	2015-11-03	136.83	43.67	26.49	547.32	174.68	238.41	M	20.7		73.2	836	2560	361120	85763	67183	44114	121065	4605	17	0.1	7	16.3	85763	33288	166142	41964.9			55697.1	1006.04	16.5	23.05	11926.2	41964.9	55697.1	1006.04
31	c	B/D/S	1	2015-08-09	235.11	148.32	47.23	940.44	593.28	425.07	F	32.3	168	89.8	1763	2288	252207	41476	18122		134130	2442	10	1.2	14	16	41476	2442	205545	63761.3	15262.5	55244	63761.3	10944.4	8.3	17.06	63761.3	33989	10944.4	28036.6
	c	B/L/D/S	2	2015-08-16	263.2	157.42	91.35	1052.8	629.68	822.15	F	29.6		82.6	2409	2740	668544	345536	101673		345536	6722	10.5	1.9	9.15	18.3	345536	41621	189597	55244	8685.25		55244	5832.37	9.14	11.05	55244	26935.6	20925.7	8685.25
17	d	B/D/S	1	2015-08-20	135.91	56.96	19.58	543.64	227.84	176.22	F	33.4	145	70.3	915	2525	210364	92678	15295	38389	92678	6729	10	0.9	6.3	9.4	92678	17865	31554.9	13881.6	1447.43	6700.28	13881.6	1447.43	6.3	22	13881.6	5440.95	6220.57	4564.37
	d	B/D/S	2	2015-08-21	139.31	56.85	19.43	557.24	227.4	174.87	F	33		69.4	922	2575	152277	38389	16725	9883	38389	14592	8.5	0	4	9	38389	27970	33406.1	6700.28	5334.25	7682.63	10001.5	2725.54	3.45	11.3	10001.5	2725.54	5654.76	5334.25
	d	B/L/S	3	2015-08-27	150.04	46.79	20.22	600.16	187.16	181.98	F	33		69.4	910			14808	2640	6939			7	-0.1						7682.63	8508.51	75749.4					75749.4
	c	>3 meals	4	2015-08-28	267.88	79.31	71.38	1071.52	317.24	642.42	F	33		69.5	2014			6939	24223				14							75749.4	21046.2
51	d	B/L/S	1	2015-09-29	73.81	41.19	27.66	295.24	164.76	248.94	F	25.7	164	69	764	2170	246752	34524	12930		106722	4335	4.5	0	17	10	4335	29013	150049	26638.1	89276.3		89276.3	12600.2	16.25	9.45	12600.2		21534.5	89276.3
34	d	D/S	1	2015-09-22	93.45	22.06	8.38	373.8	88.24	75.42	F	23.1	165	63	531			16786	10067				9	1						15662.7	28494.8						15662.7	28494.8
	d	D/S	2	2015-09-29	61.51	26.9	31.71	246.04	107.6	285.39	F			60	621			53922	23735				10	2						33066.2	62824.4						33066.2	62824.4
50	d	D/S	1	2015-09-24	104.76	17.05	19.65	419.04	68.2	176.85	F	27.3	160	70	648				45121	19887			13								13242.3							26491.1
	d	D/S	2	2015-10-01	134.62	22.78	40.86	538.48	91.12	367.74	F	27.1		69.6	973				41654	21168			12	0.8							46617.3							46617.3
62	d	D/S	1	2015-09-02	100.3	38.28	32.67	401.2	153.12	294.03	M	29.4	173	88	665			11920	28503				11	0.4						8773.49	17027.6	42147.9					8773.49	17027.6
	d	D/S	2	2015-09-06	47.16	55.39	28.17	188.64	221.56	253.53	M	29.5		88.3	648			40041	14560				12	1.1						42147.9	12111.1	13460.5					42147.9	12111.1
	d	B/D/S	3	2015-09-08	92.47	64.69	31.94	369.88	258.76	287.46	M	29.3		87.9	907			13801	32929				10	0.8						13460.5	21441.1	29138.7					13460.5			21441.1
	d	B/D/S	4	2015-09-15	80.11	60.8	38.06	320.44	243.2	342.54	M	29		86.8	1038			61173	8812				9	0.2						29138.7	9045.91	13205.2					29138.7			9045.91
	d	B/D/S	5	2015-09-17	100.15	46.55	24.6	400.6	186.2	221.4	M	29		86.8	800			20032	24804				11	0.9						13205.2	30374.7	46197.2					13205.2			30374.7
	d	B/D/S	6	2015-09-23	61.56	59.36	41.03	246.24	237.44	369.27	M	29.2		87.4	1041			95149	52416	22567			9	1						46197.2	31782.2	37930.7					46197.2			31782.2
	c	B/L/D/S	7	2015-09-24	124.88	69.21	32.88	499.52	276.84	295.92	M	28.8		86.4	1282			22567	30245				12	0						37930.7	11124.9						37930.7			11124.9
18	d	B/D/S	1	2015-08-06	81.72	93.25	63.16	326.88	373	568.44	F	29.9	167.5	84	1202	980	108740	10639	16796	17888	59542	10639	9	0.3	14	7	10639	21761	192375	42304.1	32699.6	18574.5	83661.4	42304.1	13.2	7.2	42304.1	83661.4	33709.8	32699.6
	d	B/D/S	2	2015-08-11	47.98	77.17	50.51	191.92	308.68	454.59	F	29.8		83.7	960	1775	97380.5	11841	5678	11988	34118	1647	8.5	0.8	22	17	11841	1647	203073	18574.5	24303.2		68028.1	11538.2	22	17.3	18574.5	39527.5	11538.2	68028.1
	d	B/D/S	3	2015-08-25	50.93	58.38	53.94	203.72	233.52	485.46	F	29.7		83.4	1031	1525	117870	6270	32841	11318	41921	6270	8	0.4	13	8.3	5670	15873	46449.1	5682.7	12654.5		12654.5	4690.13	22.1	8.5
44	d	D/S	1	2015-08-17	76.87	47.65	25.55	307.48	190.6	229.95	F	27.8	162	73.1	704			31760	6924	9167				1.2					50154.8	31836.8	18318	31658	31836.8	18318	8.01	21.49	31836.8	18318
	d	B/S	2	2015-08-18	64.51	42.55	24.53	258.04	170.2	220.77	F	27.3		71.9	809			9167	19181	12150				-0.1					39473.3	31658	7815.3		31658	7815.3	7.48	21.52	31658	7815.3
			3	2015-08-19	0.9	9.34	7.55	3.6	37.36	67.95	F							12150		6540									7815.3			10217.9
	d	D/S	4	2015-08-20	97.67	34.91	19.8	390.68	139.64	178.2	F	27.3		71.9	675			6540	14716	5353				1.2					17104	10217.9	6886.07	8949.12	10217.9	6886.07	7.14	22.19	10217.9	6886.07
	d	B/S	5	2015-08-21	123.9	45.95	42.04	495.6	183.8	378.36	F	26.9		70.7	1312			5353	14233	11195				-0.1					26628.5	8949.12	12837.2		12837.2	4842.22	6.43	23.06	8949.12	4842.22
13	d	B/S/D	1		125.37	53.69	30.46	501.48	214.76	274.14	F	27.7	160	71	1050	1750	35018.4	17233	13135	23023	17233	1798	10.5	0.5	7	20	17233	1798	139247	82792.9	16397.5		23806.3	82792.9	18.05	7.1	82792.9	23806.3	23806.3	16397.5
27		D	1	times logged incorrectly	48.39	23.94	14.36	193.56	95.76	129.24	F																											32765.3
23	d	L/D/S	1	2015-09-01	22.55	28.16	25.44	90.2	112.64	228.96	M	30.1	184	102.5	884				19612	22608				1.3					73345.1											73345.1
			2	2015-09-02	167.79	38.89	16.42	671.16	155.56	147.78	M	29.8		101.2				22608						1.2					119423
	d	B/D/S	3	2015-09-03	170.38	33.84	19.1	681.52	135.36	171.9	M	29.5		100	860				49077	24464				0.2					65279.9											65279.9
26	d	B/S	1	2015-08-12	124.47	25.19	10.3	497.88	100.76	92.7	F	28.1	165	76.5	871	2205	158567	26082	2924		45423	2924	6	0.7	16	23.3	26082	37014	299603	59457.1	30959		70721.5	9855.44	12.45	8	59457.1	70721.5
36	c	B/D	1		210.44	92.02	47.8	841.76	368.08	430.2	F	28.9	160	73.9	1661	2335	176280	9292	13715		56779	9292	8	1	12.3	21	9292	28554	33489.1	4965.79	2858.53		6745.57	2511.76	17.05	21.1	4965.79	4848.88	6745.57	6261.16
41	d	D	1	times logged incorrectly	52.29	13.67	4.13	209.16	54.68	37.17		28.7	176	89																									18453.2
24			1		no info			#VALUE!	0	0	F	29.9	154	71	704	1565	67851.8	28018	8691	7817	28018	663	10.5	0.7	6	12.2	28018	1987	280391	61648.7	44858.4		61648.7	9642.29	6	12.2
45	c	B/L/D/S	1		75.65	65.41	79.16	302.6	261.64	712.44	M	27.4	183	91.8	1296			3678	4800	6858			8	1.8						4069.41	4661.17						10210.3			6197.63
33		D/S	1		31.48	28.31	23.98	125.92	113.24	215.82	F	29.1	171	85	825	2055	69666.7	33210	5704	3206	33210	1398	11	0.7	6.3	7.3	1398	9391	384494	154098	22881.3	46450.2	57648.1	28093.3	14.58	11.33	56882.8	22881.3
60	d	B/S	1	2015-08-17	73.93	54.84	53.86	295.72	219.36	484.74	F	27.7	161	72	985	3310	61790	5005	13563		23519	2306		0.44	12	12.3	5005	2306	231694		49987		49987	14689.6	23.35	14		15179
52	d	D/S	1	2015-09-17	68.06	19.62	51.7	272.24	78.48	465.3	F	26.3	172	77.7	767			5876	6843				14	0.9					180070	22508	22508	26869	61331.2	14303.2	2.2	7.47	23440	26869
63			1	2015-10-08	no info			#VALUE!	0	0	M	24.4	169	69.7				49775	90408					-0.1					38915.2	19302.1	19613.1	28372.1
			2	2015-10-18	no info			#VALUE!	0	0	M	24.5		70				57120	23592					-0.2					51186.2	28372.1	22814.1
64			1	2015-10-08	no info			#VALUE!	0	0	F			64.7				40183	106628					0					75954	30041	45913
21	d	B/S	1	2015-06-08	189.49	89.92	73.79	757.96	359.68	664.11	M	22.6	172	67.4	622	3000	84883.8	23708	12923	1182	24668	10757		1.2	16	20	23708	24668	352664	77640.4	49695.1		97125.6	38533.2	15.45	19.45	77640.4	89670.1	89670.1	97125.6
12		D/S	1		142.53	29.45	18.39	570.12	117.8	165.51	F	20.8	165	56.7	835			5323	4493	11503			7.5	0.8					12789.4	2376.1	10413.3		10413.3	2376.1	19.29	7.29
		L/S	2	2015-08-19	70.19	9.55	19.9	280.76	38.2	179.1	F	20.7		56.4	867			23271	2605	6340			7.5	0.6								61336.5
		B/L/D/S	3	2015-09-08	162.14	37.31	33.65	648.56	149.24	302.85	F	21		57.2	1100			11703	2129				5	0.4					61336.5	47922.9	13413.6	134299	47922.9	13413.6	6.31	18.2
		B/L/S	4	2015-09-10	216.03	25.93	15.59	864.12	103.72	140.31	F	20.7		56.4	1089			10512	674	1214			5	0.2					134299	46745.8	11294.8		46745.8	11294.8	6.39	21.22
32	d	B/L/S	1	2015-08-13	105.71	21.57	3.73	422.84	86.28	33.57	F	24.9	164	67.1	1098			41791	24227	36718				0.4						28161.8	15308.8						28161.8			15308.8
	d	L/S	2	2015-08-20	91.55	44.85	17.95	366.2	179.4	161.55	F	25		67.5	954			72156	46858	30180				0.3						10862.3	13076.6						10862.3	13076.6
25	d	D/S	1		113.01	47.79	26.29	452.04	191.16	236.61	F	21	177	66	945	1705	95609.4	53799	13899	12642	53799	2315	9	0.4	11	15	53799	3589	294464	101922	72622.8		101922	13500.7	10.4	17.45	13500.7	72622.8
10	d	S/D	1		133.42	33.7	32.65	533.68	134.8	293.85	F	21.5		53	948			37637	49008	43241			11						15529.5	5045.64	4186.75	4482.25					4186.75
37	d	L/S	1	2015-08-19	71.9	59.21	44.94	287.6	236.84	404.46	F	24.1	168	68.1	915	3130	103276	20150	11436	23100	22270	3815	3.5	0.8	18	12.3	4836	4632	55254.2	48233.2	3734.7	8165.28	48233.2	3734.7	5.29	21.34	48233.2	3286.34
40	d	B/L/S	1		239.61	53.76	18.61	958.44	215.04	167.49	F	23	168	65	1236	1750	100367	18698	25872	20988	34028	4618	7	0	11	17.3	18698	34028	36295.5	7250.09	8675.27	6263.52	9240.55	2021.61	10.32	17.05	7250.09	9240.55	9240.55	9108
42			1		info not available			#VALUE!	0	0	F	24.3	157	60	611			17083	13780				6						380344	131868	65712.5		131868	71279	10.3	17.5
43	d	B/D/S	1		131.89	42.58	45.04	527.56	170.32	405.36	F	20.2	170	58.5	1089	2650	109712	45527	2094	11847	45527	2094	7	0.45	8	23	45527	14909	313964	90056	7986.05	55671.5	90056	7986.05	7.05	23.25	42910.2	23590.2	23590.2	51750.2
55	d	B/D/S	1	2015-10-08	127.55	41.94	43.81	0	0	0	M	24	182	79.7	1056	1940	122102	19708	32933	11272	29750	4347	13	1.8					138038	16285.4	27114	7696.94	38316	14897.4	11.22	22.45	16285.4	38316	14897.4	27114
19	d	D/S	1	2015-08-03	153.99	23	9.2	615.96	92	82.8	F	28.7		81.1	727	1450	212729	19776	22597	30028	87291	12423		1	19	14.4	19776	12423	170380	26942.1	21309.9	19004.6	44296.4	21309.9	12.3	22.15
	d	B/L/S	2	2015-08-04	91.44	24.65	20.53	365.76	98.6	184.77	F	28.3		80.1	626	1500	167486	30028	8231	21928	56595	8231		0.4	11.45	22.3	30028	56594	143422	19004.6	28153.7	25195.7	41345.1	19004.6	17.3	6.5			23395.1	41345.1
	d	D/S	3	2015-08-05	114.96	20.16	30.67	459.84	80.64	276.03	F	28.2		79.7	721			21928	27032	36346				0.1					68331.8	25195.7	24668.4	22655.6	24668.4	18467.6	22.3	19	25195.7	18467.6
	c	B/L/D/S	4	2025-11-25	201.2	107.63	70.15	804.8	430.52	631.35	F	27.8		78.6	1795			23022	35734	42823				-0.2					383526	22655.6	189482	141263	189482	22655.6	22	7	22655.6	171388	171388
	d	B/D/S	5	2015-11-26	77.58	35.32	20.87	310.32	141.28	187.83	F	27.9		78.8	619			42823	25474	36436			10	0					404328	141263	83819.6	54888.5	83819.6	38712.7	22.3	10.3	141263	38712.7	140533	83819.6
	d	B/D/S	6	2015-11-27	149.64	63.78	23.2	598.56	255.12	208.8	F	27.9		78.8	1037			36436	11002					0.7					177201	54888.5	15439.2		71443.4	15439.2	11.15	22.3	54888.5	71443.4	71443.4	35429.8
67	c	B/L/D	1	2015-11-26	394.25	117.82	101.02	1577	471.28	909.18	M	20.5	185	70	2882	1625	446161	197263	87854	107429	197263	18574	10		8	17	30511	19942	852670	219409	18411.4	61424.5	249986	18411.4	15.55	23.55	60467.4	249986	121199
	c	B/L/D	2	2015-11-27	411.89	162.01	155.23	1647.56	648.04	1397.07	M				3630	1575	663216	107429	103527	89514	370296	5665							374488	61424.5	24374.3	665035	112604	40879.1	20.35	15.35		18411.4	61424.5	40879.1
	c	B/L/D	3	2015-11-28	215.35	56.99	95.57	861.4	227.96	860.13	M				2434	1025	296486	89514	19963	83650	106295	5745							893725	665035	114305	64385.5	665035	42098.3	7.25	17.45		41287
	c	L/D	4	2015-11-29	225.5	106.54	68.76	902	426.16	618.84	M				1922			28116	86819	98298	81170	28116	8						140886	64385.5	35213.1	26485.1	64385.5	41287	11.1	16.35	64385.5		41287
	c	B/L	5	2015-11-30	332.48	104.02	55.26	1329.92	416.08	497.34	M				2032			98298	16044	18291									731242	26485.1	334460	138574	349555	9886.94	21.55	0.25	26485.1	51829.2		10855.6
	c	B/L/D/S	6	2015-12-01	486.65	187.51	159.54	1946.6	750.04	1435.86	M				3673			18291	1967										715006	138574	27969.1		439670	27553.2	20.1	0.15	138574			29410.1
24			2	2015-11-27	no info			#VALUE!	0	0	F	29.9	154	68.4	1720	1310	200410	13106	93386	24518	93386	13106		-0.7	22	6	13106	32688	99282.4	54323.3
70	c	B/L/D/S	1	2015-12-10	231.44	74.38	59.26	925.76	297.52	533.34	F	25.1	153	59.2	1857	1790	264532	58390	111300		111300	12519			22.3	16.3	58390	17961	228453	77030.2	59647.3		59647.3	11983.7	17.44	8.5	77030.2	11983.7	33248.9
71	c	B/L/D/S	1	2015-12-05	262.5	153.1	116.05	1050	612.4	1044.45	F	20.8	165	56.8	2851	2740	141950	30842	23303	38988	33705	7846		1.2	22	16.3	30842	17165	350245	121847	36386.6	14932.9	36386.6	17309.9	9	16.3	121847	67858	57597.6	23277.1
	d	B/L/D	2	2015-12-06	299.9	88.2	55.9	1199.6	352.8	503.1	F	20.4		55.6	2892	3570	169503	38988	49910	53033	49910	4630		-1.1	23	21	38988	14694	389000	14932.9	43249.1	78395.3	130950	6782.88	15.2	10.2	14932.9	6782.88	44165.3	130950
	c	B/L/D/S	3	2015-12-07	94.7	60.2	32.1	378.8	240.8	288.9	F	20.8		56.7	939	3040	107433	53033	3139	9107	53033	3139	9	1.6	9	24	53033	5400	271754	78395.3	22677.5	19146.7	78395.3	19697.7	7.3	21.39	78395.3	32488.2	23259.7	33965.7
	d	B/D/S	4	2015-12-08	100.3	70.5	39.9	401.2	282	359.1	F	20.2		55.1	1121	4190	60849	8810	4257	8166	11771	942	9	-0.1	14	18.3	9107	942	525949	19146.7	12311.3	79563.2	283272	7769.2	16.02	18.3	19146.7	25438.3	25438.3	283272
	d	B/D/S	5	2015-12-09	86.38	38.56	34.74	345.52	154.24	312.66	F	20.2		55.2	818	2840	50841	8166	569	6195	21741	569	7	0.7	9	20	8166	2461	372399	79563.2			133675	30242.8	10.2	18.45	79563.2	31714.8	30894.3	24089.6
24			3	2015-12-18	no info			#VALUE!	0	0	F	30.1	154	71.5	1010	790	69657	8559	29058	54839	29058	2173	13	-0.1	23	15.3	8559	16798	256446	118473	45635.8		118473	27429.7	6	12.1
